# Supplementary material for: Unravelling the Role of Trophoblastic-Derived Extracellular Vesicles in Regulatory T Cell Differentiation
Source: MDPI journal article supplement (doi:10.3390/ijms20143457), 2019-07-14
Supplement: s1 [file s1]

Supplementary Figure 1 Mass spectrometry of small-sized EV fraction

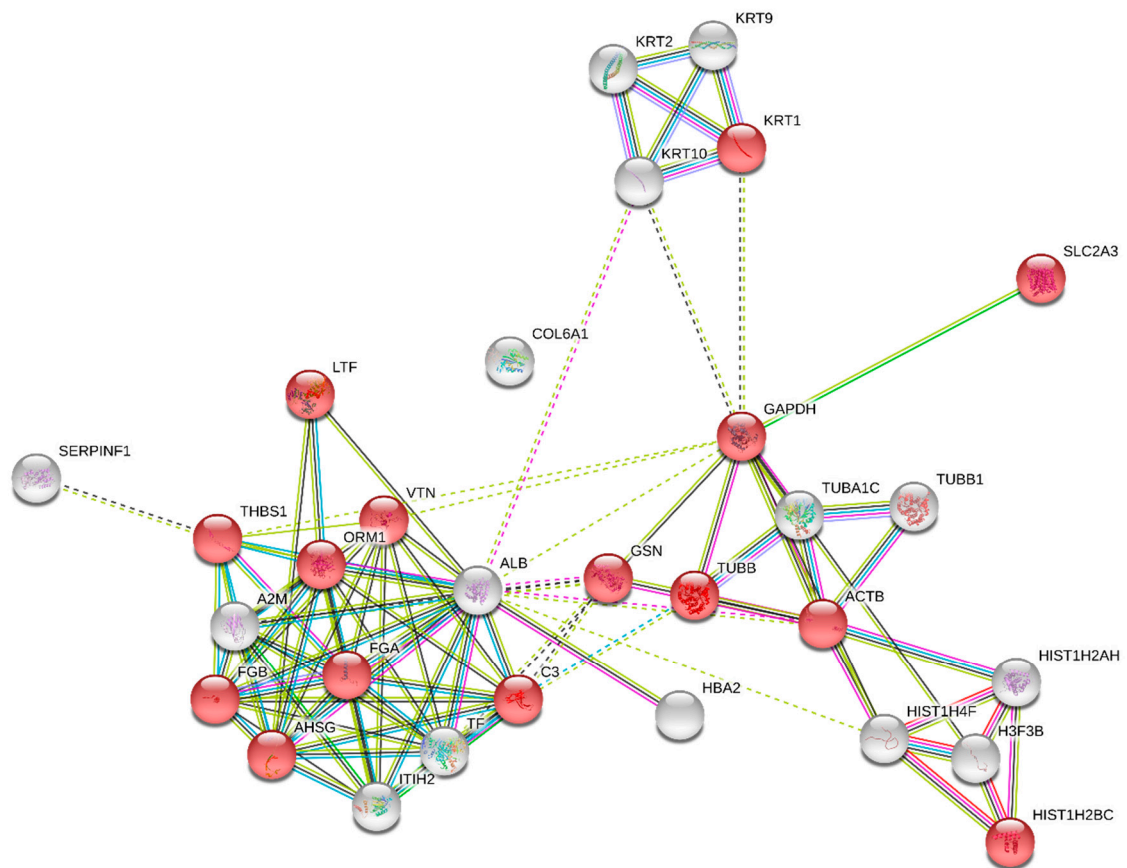

K-mean clustering of proteins identified in BeWo-derived sEVs. Red dots represented proteins are involved in immune system processes.

Supplementary Figure 2 Functional integrity of T<sub>reg</sub> cells determined by holomicroscopic analysis

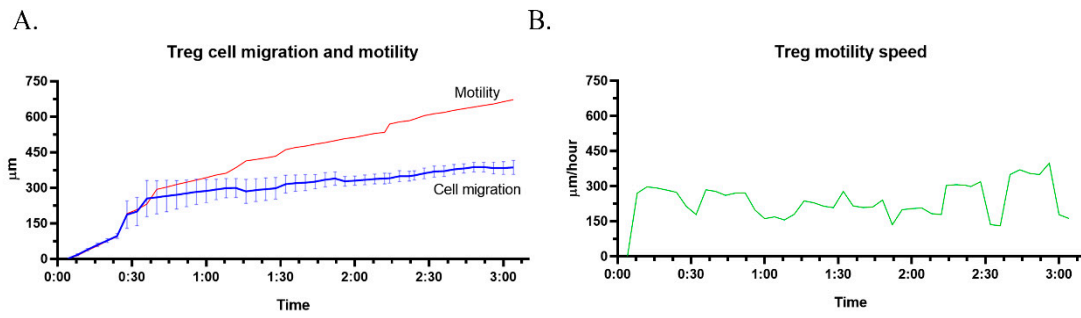

Holomicroscopic analysis of sorted CD25+CD127<sup>lo</sup> T<sub>reg</sub> shows cell migration and motility (A), and the speed of motility (B).

# Supplementary Figure 3 Optimization of transfection

A.

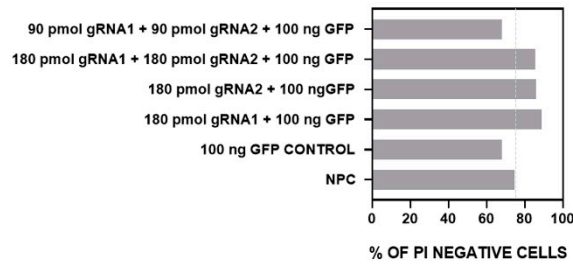

B.

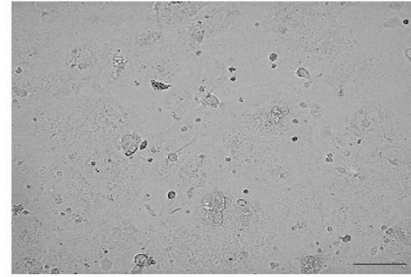

C.

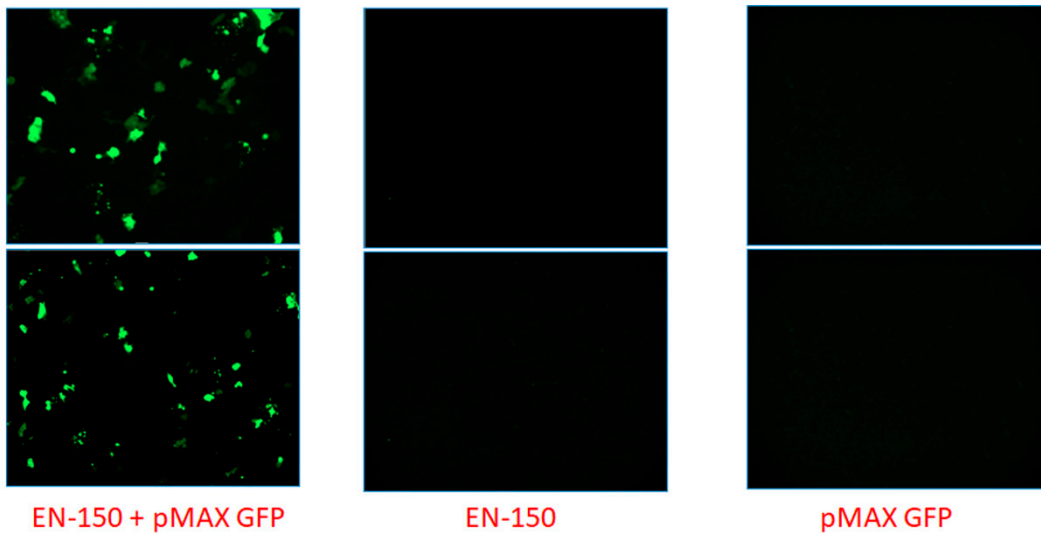

- A. Percentage of living cells (PI negative cells) 24 hours post-transfection with different gRNAs (sgRNA-1 G\*C\*U\*GCUGAAACUGUAACCAA and sgRNA-2 U\*A\*A\*ACGCUUGUCCUGCCUGU) and gRNA concentration. B. Microscopic evaluation of BeWo cell transfected with gRNA2 after 10 days. C. Validation of optimal program (EN-150) selection.

# Supplementary Figure 4 Generation of HSPE1 gene knockdown by CRISPR-Cas9 sgRNP

A.

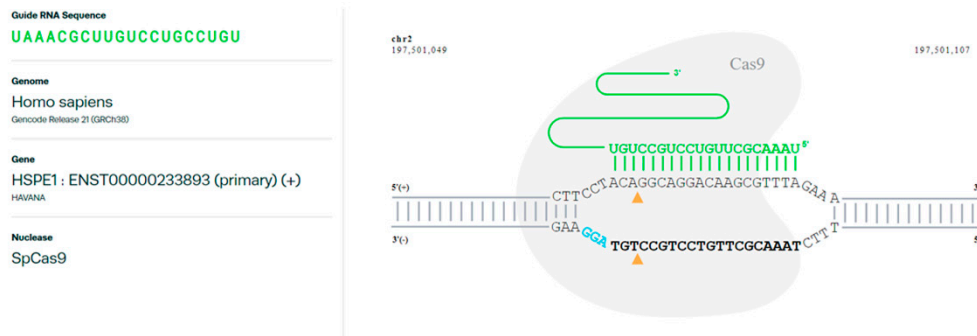

B.

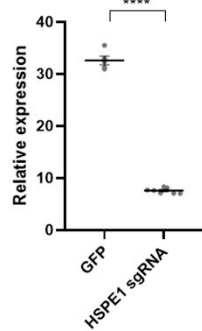

C.

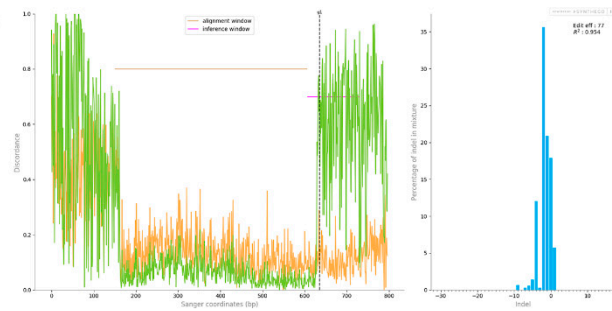

D.

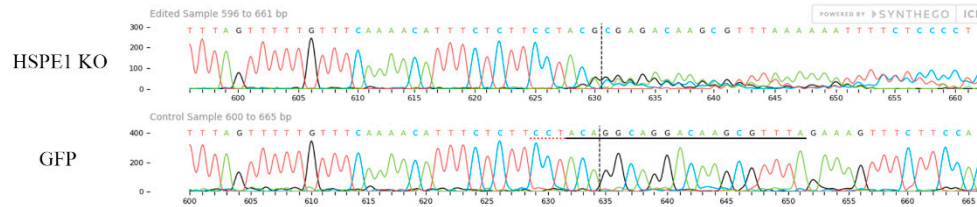

E.

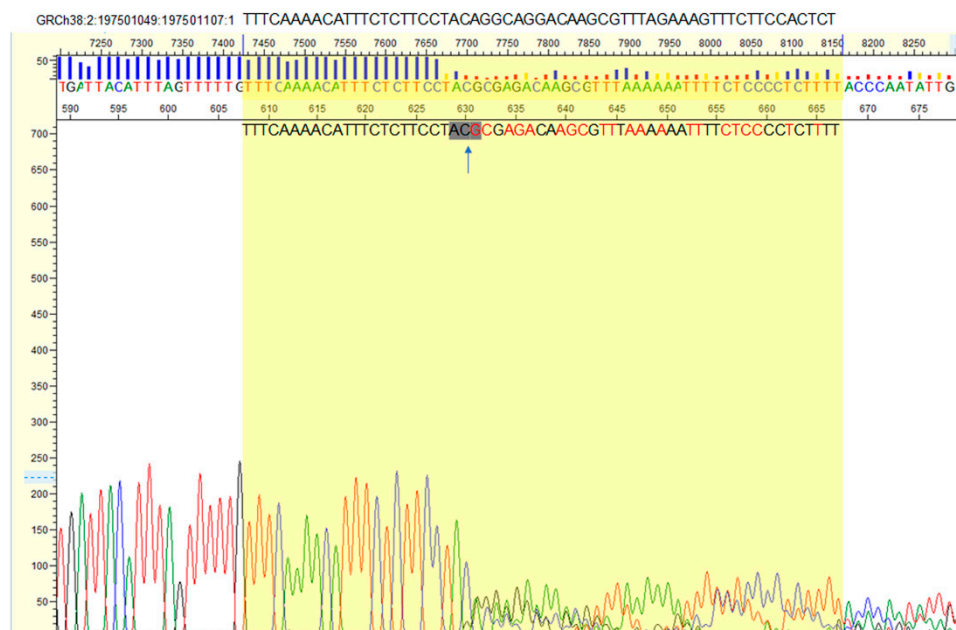

A. *HSPE1* specific gRNA design used to transfect BeWo cells. B. qPCR validation of transfection. C. ICE analysis based on Sanger sequencing validation to assess transfection efficiency. D. Sanger sequencing validation of transfection. E. Showing the targeted indel region by gRNA and the corresponding electrophoretogram.

# Supplementary Figure 5 Characterization of BeWo-derived EVs

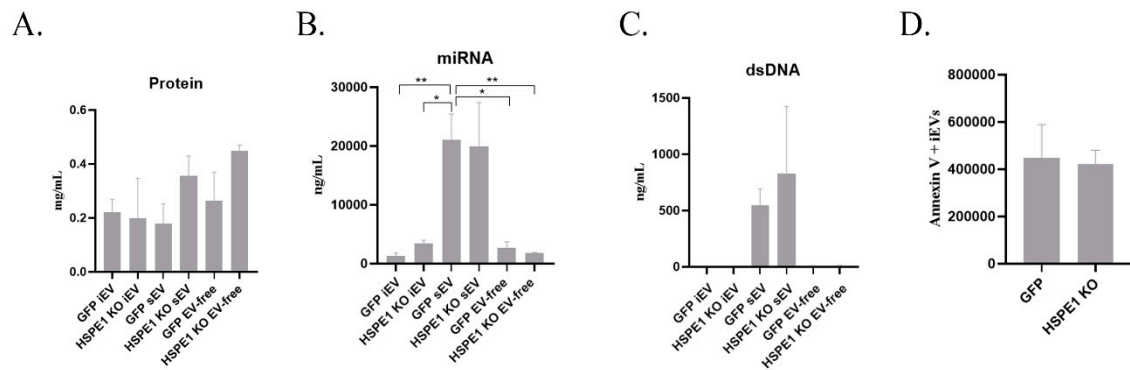

A. Protein content of GFP transfected (mock transfection) and HSPE1 KOEVs. B. miRNA content of GFP transfected and HSPE1 KO-EVs. C. dsDNA content of GFP transfected and HSPE1 KO-EVs D. Annexin V+ iEVs isolated from GFP transfected and HSPE1 KO BeWo cells.

## Supplementary Figure 6 Gating Strategy

A.

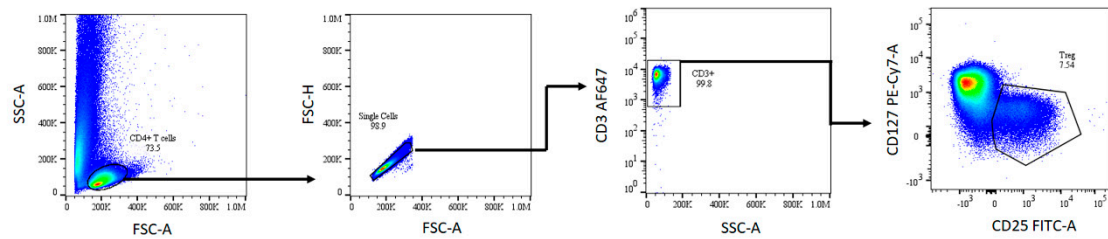

B.

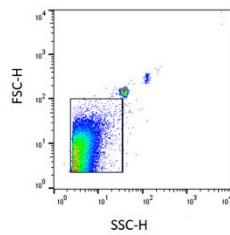

C.

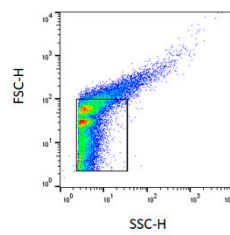

A. Gating strategy for the analysis of regulatory T cells. The morphologically intact cells were selected on the basis of FSC/SSC dot plot. Singlets were determined on FSC-A/FSC-H dot plot. CD3 positivity was used to assess purity of CD4+ sorted T cells. CD25+ CD127<sup>lo</sup> immune phenotype was used to set the gate for T<sub>reg</sub> cells. B. iEV gating strategy: upper corner of the gate is below the 1 μm silica beads. C. Megamix beads were used to detect the lower threshold of the iEV gate (the smallest size were the 200 nm beads). FSC: forward scatter, SSC: side scatter, H: height, A: area

Supplementary Table 1

| GENE                                         | FORWARD PRIMER<br>OLIGO SEQUENCE (5' TO 3') | REVERSE PRIMER<br>OLIGO SEQUENCE (5' TO 3') |
|----------------------------------------------|---------------------------------------------|---------------------------------------------|
| <b>HPRT</b>                                  | GGTCAGGCAGTATAATCCAAAG                      | GTCAAGGGCATATCCTACAAC                       |
| <b>HSPE1<br/>(for qPCR)</b>                  | GGTTGAAAGGAGTGCTGCTGAA                      | GAATGGGCAGCATCATGTTGAT                      |
| <b>HSPE1<br/>(for sanger<br/>sequencing)</b> | TAGAGCAGAGTACGAGTCTGAG                      | CCTTTCCTTTAGAACCCGATCC                      |



Supplementary Table 2

| Antibody/Dye name                         | Clone*  | Manufacturer   | Catalogue number        | Applied Methods  |
|-------------------------------------------|---------|----------------|-------------------------|------------------|
| PE/Cy7 anti-human CD127 (IL-7R $\alpha$ ) | A019D5  | SONY           | 2356595                 | FACS             |
| Alexa Fluor® 647 anti-human CD3           | SK7     | SONY           | 2324125                 | FACS             |
| PE/Cy7 Mouse IgG2b, $\kappa$ Isotype Ctrl | MPC11   | SONY           | <a href="#">2601625</a> | FACS             |
| FITC Mouse Anti-Human CD25                | M-A251  | BD Biosciences | <a href="#">555431</a>  | FACS             |
| Anti-human HSPE1 rabbit Ab                | EPR4475 | Abcam          | ab109489                | FACS; immunoblot |
| Anti-rabbit IgG1 $\kappa$ 1 – AF488       |         | Abcam          | ab150077                | FACS             |
| FITC Annexin V                            |         | Biolegend      | 640906                  | FACS             |
